# Supplementary material for: AtGSTU19 and AtGSTU24 as Moderators of the Response of Arabidopsis thaliana to Turnip mosaic virus
Source: MDPI journal article supplement (doi:10.3390/ijms231911531), 2022-09-29
Supplement: s1 [file s1]

**Table S1. TuMV detection assessment using DAS-ELISA on *Arabidopsis thaliana* wild type and mutant leaves at 3 and 7 dpi. Values presented are mean optical density (OD<sub>405nm</sub>) values. Absence of virus is marked by (-). Presence of TuMV (+) is confirmed in samples with mean OD<sub>405nm</sub> above estimated cut off point: 0.1412.**

| Sample                                   | Mean<br>OD <sub>450nm</sub> | Presence<br>(+)/absence<br>of the virus<br>(-) |
|------------------------------------------|-----------------------------|------------------------------------------------|
| buffer                                   | 0.0001                      | -                                              |
| mock-inoculated Col-0 (3dpi)             | 0.0305                      | -                                              |
| mock-inoculated <i>Atgstu19</i> (3dpi)   | 0.0213                      | -                                              |
| mock-inoculated <i>Atgstu24</i> (3dpi)   | 0.0200                      | -                                              |
| TuMV-inoculated Col-0 (3dpi)             | 0.8820                      | +                                              |
| TuMV-inoculated <i>Atgstu19</i> (3dpi)   | 0.7519                      | +                                              |
| TuMV-inoculated <i>Atgstu 24</i> (3dpi)  | 0.5200                      | +                                              |
| mock-inoculated Col-0 (7dpi)             | 0.0501                      | -                                              |
| mock-inoculated <i>Atgstu19</i> (7dpi)   | 0.0521                      | -                                              |
| mock-inoculated <i>Atgstu 24</i> (7dpi)  | 0.0402                      | -                                              |
| TuMV-inoculated Col-0 (7dpi)             | 1.425                       | +                                              |
| TuMV-inoculated <i>Atgstu19</i> (7dpi)   | 3.321                       | +                                              |
| TuMV-inoculated <i>Atgstu24</i> (7dpi)   | 0.693                       | +                                              |
| mock-inoculated Col-0 (14dpi)            | 0.0600                      | -                                              |
| mock-inoculated <i>Atgstu19</i> (14dpi)  | 0.0632                      | -                                              |
| mock-inoculated <i>Atgstu 24</i> (14dpi) | 0.0606                      | -                                              |
| TuMV-inoculated Col-0 (14dpi)            | 1.939                       | +                                              |
| TuMV-inoculated <i>Atgstu19</i> (14dpi)  | 4.026                       | +                                              |
| TuMV-inoculated <i>Atgstu24</i> (14dpi)  | 0.299                       | +                                              |

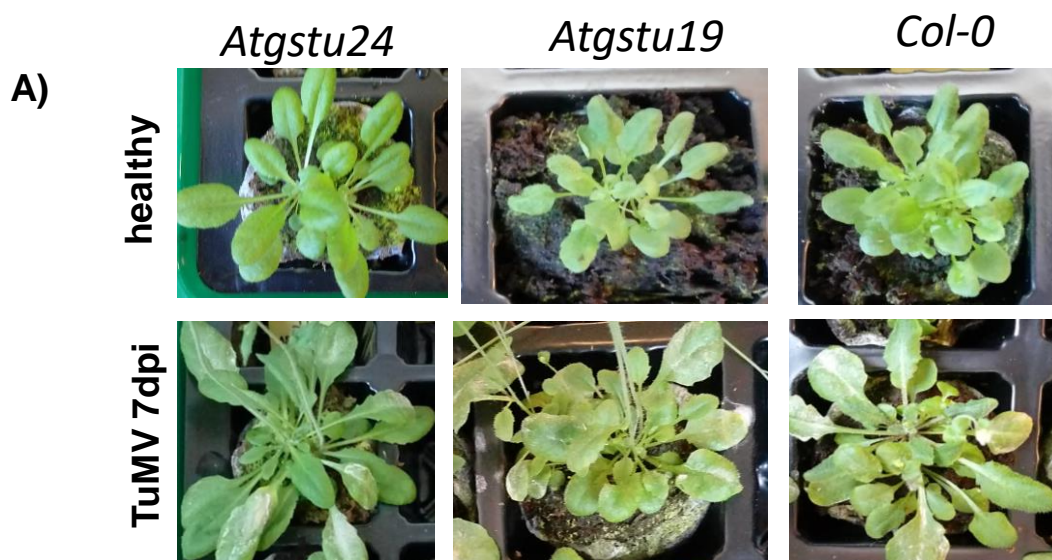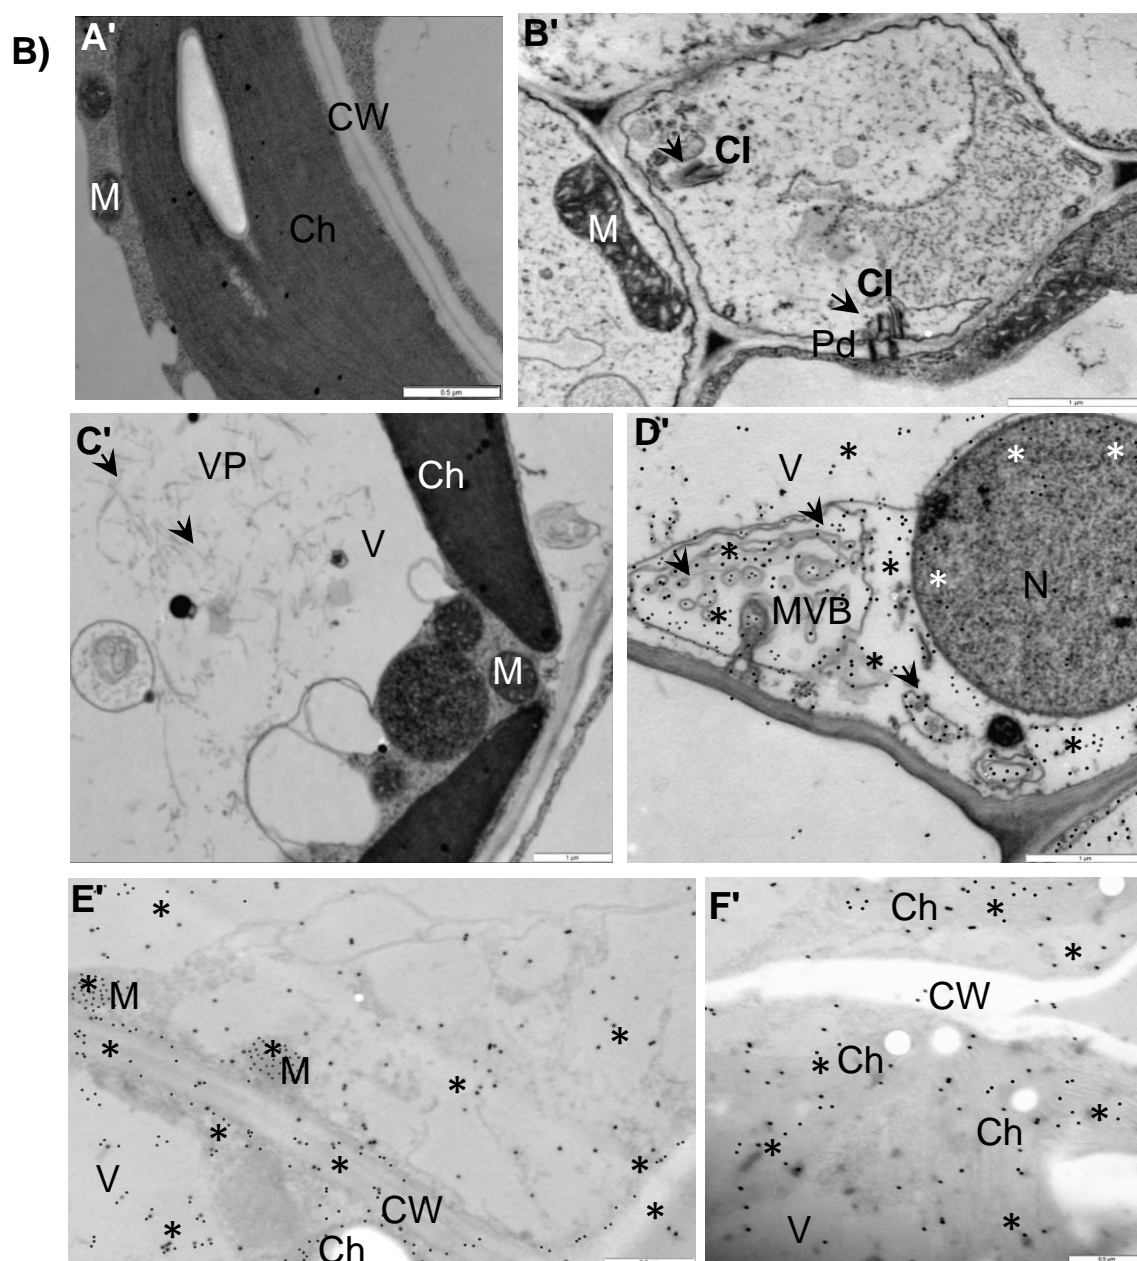

Supplementary Figure S1

### Supplementary Figure S1

**Panel A)** - *Arabidopsis thaliana Atgstu24, Atgstu19* knockout mutant plants and Col-0 wild type plants: healthy plants, and 7 dpi after TuMV inoculation;

**Panel B)** – Ultrastructural changes in Col-0 wild type inoculated leaves: **(A')** Unchanged mesophyll cell from Col-0 mock-inoculated leaf. CW-cell wall, Ch-chloroplast, M-mitochondria. Scale bar 0.5µm; **(B')** TuMV cytoplasmic inclusions (CI, arrows) in phloem parenchyma cells 7 days after TuMV inoculation. M-mitochondria, Pd-plasmodesmata. Scale bar 1µm. **(C')** Virus particles (VP, arrows) in vacuole (V) of mesophyll cell. Ch-chloroplast, M-mitochondria. Scale bar 1µm. **(D')** Gold particles indicating TuMV (\*) in multivesicular bodies (MVB, arrows) and in nucleus (N) in mesophyll cell 7 dpi after TuMV inoculation. Scale bar 1µm. **(E')** Gold granules indicating GSH (\*) deposition along cell wall (CW), in mitochondria (M) and chloroplasts (Ch) in phloem Col-0 7dpi TuMV-inoculated leaf. Scale bar 0.5 µm. **(F')** GSH (\*) deposition in changed chloroplasts (Ch) in Col-0 mesophyll cell 14 days after TuMV inoculation. Scale bar 0.5 µm.

**Table S2.** Heatmap of PCC for *AtGSTU1* normalized expression (based on *AtEf1α* and *AtF-Box*) and *TuMV* levels in virus-inoculated **Col-0**, *Atgstu19* and *Atgstu24* plants from 3 to 14 dpi. PCC matrix values are presented pairwise for specific cell compartments in specific time dpi and marked with colors, from very dark blue (PCC = 1) to bright blue (PCC = -1).

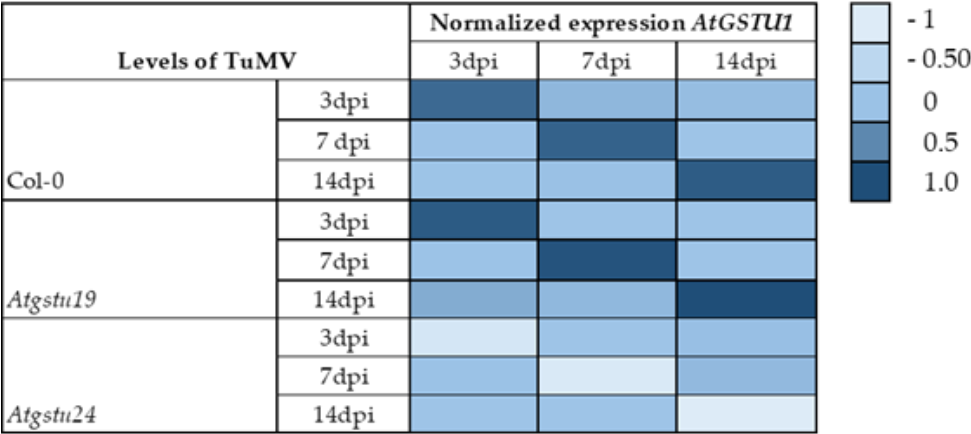

**Table S3.** Heatmap of PCC for *AtGSTU13* normalized expression (based on *AtEf1α* and *AtF-Box*) and *TuMV* levels in virus-inoculated **Col-0**, *Atgstu19* and *Atgstu24* plants from 3 to 14 dpi. PCC matrix values are presented pairwise for specific cell compartments in specific time dpi and marked with colors, from very dark blue (PCC = 1) to bright blue (PCC = -1).

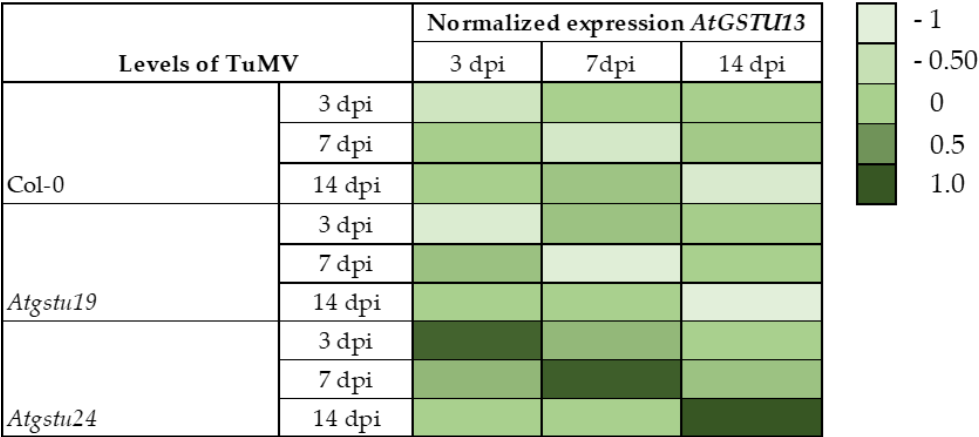

**Table S4.** Heatmap of PCC for *AtGSTU19* normalized expression (based on *AtEf1α* and *AtF-Box*) and *TuMV* levels in virus-inoculated **Col-0**, *Atgstu19* and *Atgstu24* plants from **3 to 14 dpi**. PCC matrix values are presented pairwise for specific cell compartments in specific time dpi and marked with colors, from very dark blue (PCC = 1) to bright blue (PCC = -1).

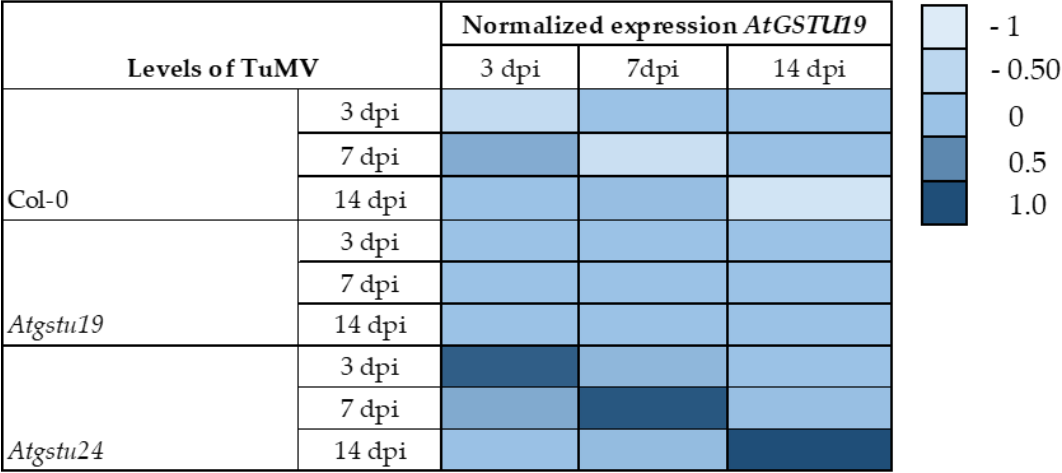

**Table S5.** Heatmap of PCC for *AtGSTU24* normalized expression (based on *AtEf1α* and *AtF-Box*) and *TuMV* levels in virus-inoculated **Col-0**, *Atgstu19* and *Atgstu24* plants from **3 to 14 dpi**. PCC matrix values are presented pairwise for specific cell compartments in specific time dpi and marked with colors, from very dark blue (PCC = 1) to bright blue (PCC = -1).

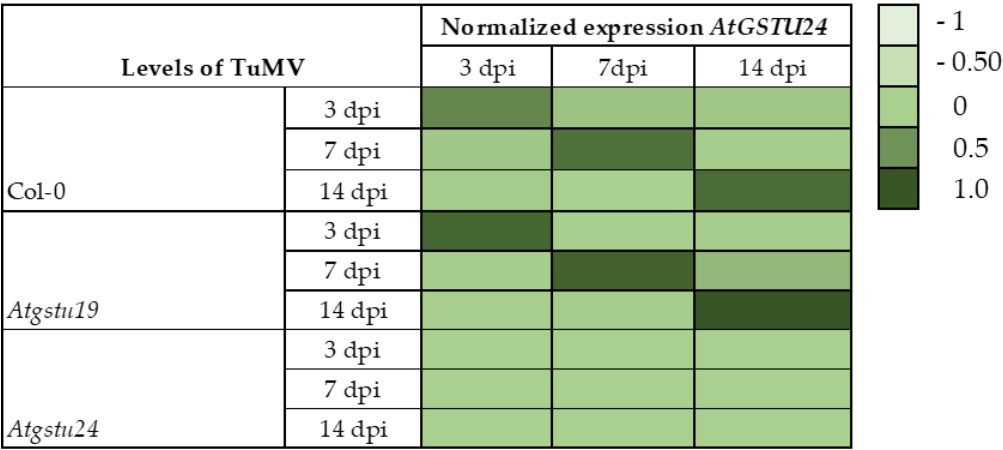

**Table S6.** Primer sequences for RT-qPCR analyses

| Genes               | Forward Primer                                         | Reverse Primer                                     | Concentration in Reaction (μM) |
|---------------------|--------------------------------------------------------|----------------------------------------------------|--------------------------------|
| <i>Investigated</i> |                                                        |                                                    |                                |
| <i>TuMV-CP</i>      | 5'-<br>CCGGAATTC<br>ATGRTITGGT<br>GYATIGAIAA<br>YGG-3' | 5'-<br>CGCGGATCCGCIG<br>YYTTCATYTGIRIIW<br>KIGC-3' | 0.5                            |
| <i>AtGSTU1</i>      | 5'-<br>GCAGTGAGG<br>GGATGTATTC<br>-3'                  | 5'-<br>TTTCGTAGGCAAG<br>AAGTATCT-3'                | 0.5                            |
| <i>AtGSTU13</i>     | 5'-<br>CGCAAAGCA<br>AAAGTTCAA<br>TGT-3'                | 5'-<br>TGGCACAAAACA<br>CAGACAAAT-3'                | 0.5                            |
| <i>AtGSTU19</i>     | 5'-<br>ATGATGCTC<br>AGAGGAAGG<br>TG-3'                 | 5'-<br>ATAGCCAAAGTC<br>ATCGCCAC-3'                 | 0,5                            |
| <i>AtGSTU24</i>     | 5'-<br>AAGGTGAGG<br>AGCAAGAAG<br>CA-3'                 | 5'-<br>ACATACCCAAAA<br>GTTTCGTCTC-3'               | 0.5                            |
| <i>Reference</i>    |                                                        |                                                    |                                |
| <i>AtEF1a</i>       | 5'-<br>CACCACTGG<br>AGGTTTTGAG<br>G-3'                 | 3'-<br>TGGAGTATTGGG<br>GGTGGT-5'                   | 0.5                            |
| <i>AtF-Box</i>      | 5'-<br>GCTTGCACA<br>CGCCATATC<br>AAT-3'                | 3'-<br>TGGATTTTACCAC<br>CTTCCGCA-5'                | 0.5                            |

**Table S7.** Conditions of the RT-qPCR for the reference genes (\*).

| Program                   | Parameters         |
|---------------------------|--------------------|
| Preliminary denaturation  | 95 °C for 5 min    |
| Amplification (35 cycles) | 95 °C for 10 s     |
|                           | 58 °C for 10 s     |
|                           | 72 °C for 20 s *   |
| Melting curve             | 65–95 °C; 0.1 °C/s |
